# Supplementary material for: Glypicans define unique roles for the Hedgehog co-receptors boi and ihog in cytoneme-mediated gradient formation
Source: eLife. 2021 Aug 6;10:e64581. doi: 10.7554/eLife.64581 (PMC8410076; doi:10.7554/eLife.64581)
Supplement: Figure 2—source data 1. [file elife-64581-fig2-data1.xlsx]

## Sheet: Hoja1
Ihog RFP					DFN					DFN1					DFN2					FN1***					Dig
Control Interno	Experimental	Incremento (B/A)	C-1		Control Interno	Experimental	Incremento (G/F)	H-1		Control Interno	Experimental	Incremento (L/K)	M-1		Control Interno	Experimental	Incremento (L/K)	M-1		Control Interno	Experimental	Incremento (L/K)	M-1		Control Interno	Experimental	Incremento (L/K)	M-1
12567987	19217918	1.52912	0.529117		50506	43036	0.852097	-0.147903		20902458	23260087	1.11279	0.112792		38236	59161	1.54726	0.547259		14658713	21157168	1.44332	0.443317		38236	59161	1.54726	0.547259
14062190	19061160	1.35549	0.35549		80989	81409	1.00519	0.00518589		20103299	22831127	1.13569	0.135691		38668	53464	1.38264	0.382642		14939243	20691179	1.38502	0.385022		38668	53464	1.38264	0.382642
16522082	22640493	1.37032	0.370317		26990	25037	0.92764	-0.0723601		16481515	19910988	1.20808	0.20808		55824	79262	1.41986	0.419855		17625231	29875035	1.69502	0.695015		55824	79262	1.41986	0.419855
2773141	4367329	1.57487	0.574867		44887	49343	1.09927	0.0992715		12399591	12697271	1.02401	0.0240072		46427	75955	1.63601	0.636009		20911827	32229280	1.5412	0.541199		46427	75955	1.63601	0.636009
2394551	4186417	1.74831	0.74831		59586	55884	0.937871	-0.0621287		16567719	18002431	1.0866	0.0865968		50680	70561	1.39228	0.392285		80088	114926	1.435	0.434997		50680	61076	1.20513	0.20513
7366463	10350589	1.4051	0.405096		97979	93687	0.956195	-0.0438053		17441956	20094903	1.1521	0.152101		47035	69921	1.48657	0.486574		22116843	31970061	1.44551	0.445507		47035	69921	1.48657	0.486574
6585827	11123519	1.68901	0.689009							18770841	21829363	1.16294	0.16294		40229	62945	1.56467	0.564667							40229	62945	1.56467	0.564667
MEDIA		1.5246	0.524601				0.963043	-0.0369567				1.12603	0.12603				1.4899	0.489899				1.49084	0.490843				1.46316	0.463162
DESV.		0.156155	0.156155				0.0831591	0.0831591				0.0591699	0.0591699				0.096763	0.096763				0.112119	0.112119				0.11673	0.11673
		MEDIA x100	DesvEst						MEDIA x100	DesvEst
	Ihog	52.4601	15.6155					Ihog	52.4601	15.6155
	Dig	49	11.7					FN1***	49.0843	11.2119
	DFN	-3.7	8.31591
	DFN1	12.603	5.91699
	DFN2	13.3147	4.1849
