# Supplementary material for: Glypicans define unique roles for the Hedgehog co-receptors boi and ihog in cytoneme-mediated gradient formation
Source: eLife. 2021 Aug 6;10:e64581. doi: 10.7554/eLife.64581 (PMC8410076; doi:10.7554/eLife.64581)
Supplement: Figure 2—source data 2. [file elife-64581-fig2-data2.xlsx]

## Sheet: Hoja1
Ihog RFP					DFN					DFN1					DFN2					FN1***					Dig
Control Interno	Experimental	Incremento (B/A)	C-1		Control Interno	Experimental	Incremento (G/F)	H-1		Control Interno	Experimental	Incremento (L/K)	M-1		Control Interno	Experimental	Incremento (L/K)	M-1		Control Interno	Experimental	Incremento (L/K)	M-1		Control Interno	Experimental	Incremento (L/K)	M-1
8668164	11498412	1.32651	0.326511		53248	59783	1.12273	0.122728		36854	43213	1.17255	0.172546		35459	57602	1.62447	0.624468		8445893	13128011	1.55437	0.554366		17691644	25072393	1.41719	0.417188
34976	53765	1.5372	0.537197		29077	28230	0.97087	-0.0291296		37612	47141	1.25335	0.25335		38970	55436	1.42253	0.42253		17124998	24412002	1.42552	0.425519		15423610	21393228	1.38704	0.387044
9160917	14834384	1.61931	0.619312		41907	43012	1.02637	0.0263679		33783	38557	1.14131	0.141314		37507	55513	1.48007	0.48007		12965042	21233945	1.63778	0.637785		14732791	21643084	1.46904	0.469042
10280886	16602588	1.6149	0.614899		41738	39646	0.949878	-0.0501222		52962	56973	1.07573	0.0757335		52920	60484	1.14293	0.142933		11854553	19567170	1.6506	0.650604		10212830	16101653	1.57661	0.57661
9243082	11497886	1.24395	0.243945		41965	46046	1.09725	0.0972477		53012	73180	1.38044	0.380442		43556	58189	1.33596	0.335958		12022528	17220251	1.43233	0.432332		10543840	15416634	1.46215	0.462146
5806983	8312078	1.43139	0.431394		20734	20537	0.990499	-0.0095013		46547	67669	1.45378	0.453778		36933	57418	1.55465	0.554653							9309126	14313651	1.53759	0.537593
6190819	10051537	1.62362	0.62362		33317	31783	0.953957	-0.0460426		52641	59984	1.13949	0.139492		41367	66552	1.60882	0.608819							9784198	17076835	1.74535	0.745348
MEDIA		1.48527	0.485268				1.01594	0.0159354				1.23095	0.230951				1.45278	0.452776				1.54012	0.540121				1.46241	0.513567
DESV.		0.154355	0.154355				0.0695316	0.0695316				0.139287	0.139287				0.171034	0.171034				0.108051	0.108051				0.121242	0.121242
		MEDIAx100	DesvEst						MEDIAx100	DesvEst
	Ihog	48.5268	15.4355					Ihog	48.5268	15.4355
	Dig	51.4	12.4					FN1***	54.0121	10.8051
	DFN	1.59354	6.95316
	DFN1	23.0951	13.9287
	DFN2	45.2776	17.1034
