# Supplementary material for: Glypicans define unique roles for the Hedgehog co-receptors boi and ihog in cytoneme-mediated gradient formation
Source: eLife. 2021 Aug 6;10:e64581. doi: 10.7554/eLife.64581 (PMC8410076; doi:10.7554/eLife.64581)
Supplement: Figure 3—source data 1. [file elife-64581-fig3-data1.xlsx]

## Sheet: Hoja1
Ihog RFP					DFN					DFN1					DFN2					FN1***
Control Interno	Experimental	Incremento (B/A)	C-1		Control Interno	Experimental	Incremento (G/F)	H-1		Control Interno	Experimental	Incremento (L/K)	M-1		Control Interno	Experimental	Incremento (L/K)	M-1		Control Interno	Experimental	Incremento (L/K)	M-1
21309	70251	3.29678	2.29678		23030	25377	1.10191	0.101911		26489	28252	1.06656	0.0665559		43484	68534	1.57607	0.576074		31315	31398	1.00265	0.00265049
17312	57674	3.33145	2.33145		89001	78098	0.877496	-0.122504		46344	46453	1.00235	0.00235198		41336	59560	1.44087	0.440875		37761	39226	1.0388	0.0387966
14684	52863	3.60004	2.60004		33968	33416	0.983749	-0.0162506		5479	5752	1.04983	0.0498266		41205	70029	1.69953	0.699527		58165	61972	1.06545	0.0654517
13810	56033	4.05742	3.05742		94011	101467	1.07931	0.0793099		18224	19399	1.06448	0.0644754		56773	83216	1.46577	0.465767		56088	62274	1.11029	0.110291
18899	57045	3.01841	2.01841		79634	75488	0.947937	-0.0520632		21104	19705	0.933709	-0.0662908		41222	62150	1.50769	0.50769		44718	48026	1.07397	0.0739747
19160	60112	3.13737	2.13737		24483	25715	1.05032	0.0503206		16402	16955	1.03372	0.0337154		42797	68151	1.59242	0.592425		84271	79919	0.948357	-0.0516429
					22473	21279	0.94687	-0.0531304		18554	19947	1.07508	0.0750782							85078	84277	0.990585	-0.00941489
MEDIA		3.40691	2.40691				0.998228	-0.00177248				1.03224	0.0499414				1.54706	0.54706				1.03287	0.0328724
DESV.		0.374666	0.374666				0.0816402	0.0816402				0.0499414	0.0499414				0.0954774	0.0954774				0.0557135	0.0557135
		MEDIA x100	DesvEst
	Ihog	240.691	37.4666
	DFN	-0.177248	8.16402
	DFN2	54.706	9.54774
	DFN1	4.99414	4.99414
	FN1 ***	3.28724	5.57135
	FN1 Cherry	28.3073	3.47413
