# Supplementary material for: Glypicans define unique roles for the Hedgehog co-receptors boi and ihog in cytoneme-mediated gradient formation
Source: eLife. 2021 Aug 6;10:e64581. doi: 10.7554/eLife.64581 (PMC8410076; doi:10.7554/eLife.64581)
Supplement: Figure 5—source data 1. [file elife-64581-fig5-data1.xlsx]

## Sheet: Hoja1
UAS Ihog RFP	UAS GMA GFP	UAS ihog and Boi RNAis	UAS Boi	Delta CT	CT RFP	Delta Ig RFP	DeltaFN RFP	Delta FN1 RFP	Delta FN2 RFP	Ihog FN1 *** RFP	Ihog FN2 ** RFP	Ihog FN2 **
>30	1	10	14	>30	10	6	8	4	6	>30	4	10
>30	9	9	6	>30	6	8	10	8	8	>30	4	2
>30	7	7	8	>30	18	8	4	6	4	>30	6	10
>30	19	11	4	>30	6	4	10	8	6	>30	10	2
>30	6	5	10	>30	8	6	14	4	6	>30	2	2
>30	15	6	4	>30	4	4	10	6	4	>30	14	14
>30	8	11	2	>30	6	4	6	2	6	>30	12	8
>30	14	2	2	>30	4	10	14	12	10	>30	4	10
>30	3	6	2	>30	6	4	6	2	2	>30	10	10
>30	3	11	2	>30	6	12	2	14	4	>30	4	6
>30	4	4	4	14	6	10	12	4	2	>30	2	6
>30	3	5	14	8	6	2	20	2	6	>30	8	14
>30	4	10	6	6	4	8	6	6	4	>30	4	4
>30	3	7	6	>30	10	2	6	10	4	>30	2	2
>30	4	4	4	>30	8	8	4	2	8	>30	12	6
>30	2	12	4	>30	2	2	6	10	16	>30	4	4
>30	5	5	4	>30	4	2	12	10	14	>30	4	2
>30	3	12	8	>30	4	10	10	4	12	>30	4	8
>30	7	2	14	>30	4	2	6	6	2	>30	4	10
>30	7	7	12	>30	2	14	16	8	6	>30	10	10
>30	3	10		>30	8	10	12	8	6	>30	2	6
>30	12	6		>30	8	6	12	6	20	>30	10	10
4	9	8		>30	2	12	4	4	6	>30	6	4
22	7	12		16	2	6	10	4	2	>30	4	12
14	5	9		8	8	2	6	6	6	>30	12	6
6	4	8		4	6	10	8	10	4	>30	4	6
>30	6	9		>30	10	8	6	4	8	>30	8	4
22	2	6		>30	4	2	20	6	10	>30	4	2
2	12	2		>30	6	6	14	2	4	>30	10	8
12	6	16		>30	6	6	4	4	6	>30	4	10
16	7	2		>30	4	10	14	2	4	>30	10	10
6	6	6		>30	4	4	12	6	4	>30	6	10
14	3	7		>30	2	6	10	6	2	>30	4	4
4	20	4		>30	2	6	10	6	18	>30	4	8
6	5	4		>30	6	6	6	10	14	>30	6	4
>30	12	13		>30	6	4	10	8	4	>30	4	10
>30	5	7		6	6	4	2	8	6	>30	2	6
>30	5	9		4	4	6	2	10	2	>30	8	4
>30	3	12		2	4	2	8	2	6	>30	4	10
>30	6	5		>30	10	12	14	12	4	>30	14	4
>30	1	8		>30			16		2	10
>30	7	4		>30			4		16	6
>30	7	14		>30			6		10	8
>30	7	7		>30			10		8	2
2	4	6		>30			10			8
>30	2	10		>30			8			2
>30	4	16		>30			14			8
2	4	12		>30			16			12
>30	1	12		>30			10			16
2	6	5		12			6
10	4	5		6			6
22	2	2		4			14
6	13	15					8
18	11	8					10
	8	8					6
	8	13					8
	4	9					6
	8	3					12
	9	10					16
	2	3					12
		4					6
		3					6
		3					8
		6					10
		6					10
		2					10
		7					12
		1					8
		2					12
		9					8
							6
							8
							4
							6
							4
