# Supplementary material for: Glypicans define unique roles for the Hedgehog co-receptors boi and ihog in cytoneme-mediated gradient formation
Source: eLife journal article supplement (doi:10.7554/elife.64581), 2021-08-06
Supplement: supp [file elife_poa_e64581_Source_code_1.pdf › elife_poa_e64581_Source_code_1.pdf]

## STATISTICAL ANALYSIS OF DALLY RECRUITMENT

R version 3.5.2 (2018-12-20) -- "Eggshell Igloo"  
Copyright (C) 2018 The R Foundation for Statistical Computing  
Platform: i386-w64-mingw32/i386 (32-bit)

R is free software and comes with ABSOLUTELY NO WARRANTY.  
You are welcome to redistribute it under certain conditions.  
Type 'license()' or 'licence()' for distribution details.

R is a collaborative project with many contributors.  
Type 'contributors()' for more information and  
'citation()' on how to cite R or R packages in publications.

Type 'demo()' for some demos, 'help()' for on-line help, or  
'help.start()' for an HTML browser interface to help.  
Type 'q()' to quit R.

```
> library(readxl)
> DallyR <- read_excel("C:/Users/USUARIO/Desktop/FOTOS NUEVAS/CUANTIFI
CACIÓN GLIPICANOS/DallyR.xlsx")
> View(DallyR)
> attach(DallyR)
> Trat=split(DallyR$D11,DallyR$Tratamiento,drop=FALSE)
> shapiro.test(Trat$Ihog)
```

Shapiro-wilk normality test

data: Trat\$Ihog  
W = 0.91208, p-value = 0.4105

```
> shapiro.test(Trat$DFN)
```

Shapiro-wilk normality test

data: Trat\$DFN  
W = 0.96125, p-value = 0.8294

```
> shapiro.test(Trat$DFN1)
```

Shapiro-wilk normality test

data: Trat\$DFN1  
W = 0.97862, p-value = 0.9526

```
> shapiro.test(Trat$DFN2)
```

Shapiro-wilk normality test

data: Trat\$DFN2  
W = 0.98548, p-value = 0.9818

```
> shapiro.test(Trat$DIg)
```

Shapiro-wilk normality test

data: Trat\$DIg  
W = 0.92607, p-value = 0.518

```
pairwise.t.test(D11,Tratamiento, paired = FALSE)
```

Pairwise comparisons using t tests with pooled SD

data: D11 and Tratamiento

|        | DFN     | DFN1    | DFN2    | DIg   | FN1+++ |
|--------|---------|---------|---------|-------|--------|
| DFN1   | 0.027   | -       | -       | -     | -      |
| DFN2   | 0.023   | 1.000   | -       | -     | -      |
| DIg    | 4.7e-10 | 6.1e-07 | 8.1e-07 | -     | -      |
| FN1+++ | 1.0e-09 | 1.0e-06 | 1.3e-06 | 1.000 | -      |
| Ihog   | 9.9e-11 | 1.1e-07 | 1.5e-07 | 1.000 | 1.000  |

P value adjustment method: holm

## STATISTICAL ANALYSIS OF DLP RECRUITMENT

R version 3.5.2 (2018-12-20) -- "Eggshell Igloo"  
Copyright (C) 2018 The R Foundation for Statistical Computing  
Platform: i386-w64-mingw32/i386 (32-bit)

R is free software and comes with ABSOLUTELY NO WARRANTY.  
You are welcome to redistribute it under certain conditions.  
Type 'license()' or 'licence()' for distribution details.

R is a collaborative project with many contributors.  
Type 'contributors()' for more information and  
'citation()' on how to cite R or R packages in publications.

Type 'demo()' for some demos, 'help()' for on-line help, or  
'help.start()' for an HTML browser interface to help.  
Type 'q()' to quit R.

```
> library(readxl)
> Dallyliker <- read_excel("C:/Users/USUARIO/Desktop/FOTOS NUEVAS/CUAN
TIFICACIÓN GLIPICANOS/Dallyliker.xlsx")
> View(Dallyliker)
> attach(Dallyliker)
> Trat=split(Dallyliker$DLP,Dallyliker$Tratamiento,drop=FALSE)
> shapiro.test(Trat$Ihog)
```

Shapiro-wilk normality test

data: Trat\$Ihog  
W = 0.86281, p-value = 0.1604

```
> shapiro.test(Trat$DFN)
```

Shapiro-wilk normality test

data: Trat\$DFN  
W = 0.87104, p-value = 0.1896

```
> shapiro.test(Trat$DFN1)
```

Shapiro-wilk normality test

data: Trat\$DFN1  
W = 0.90397, p-value = 0.3557

```
> shapiro.test(Trat$DFN2)
```

Shapiro-wilk normality test

data: Trat\$DFN2  
W = 0.91788, p-value = 0.4531

```
> shapiro.test(Trat$`FN1+++`)
```

Shapiro-wilk normality test

data: Trat\$`FN1+++`  
W = 0.97769, p-value = 0.9219  
> shapiro.test(Trat\$Dig)

Shapiro-wilk normality test

data: Trat\$Dig  
W = 0.90305, p-value = 0.3498

```
> pairwise.t.test(DLP,Tratamiento)
```

Pairwise comparisons using t tests with pooled SD

data: DLP and Tratamiento

|        | DFN     | DFN1   | DFN2   | Dig    | FN1+++ |
|--------|---------|--------|--------|--------|--------|
| DFN1   | 0.0324  | -      | -      | -      | -      |
| DFN2   | 6.4e-06 | 0.0288 | -      | -      | -      |
| Dig    | 6.4e-07 | 0.0037 | 1.0000 | -      | -      |
| FN1+++ | 1.3e-06 | 0.0037 | 1.0000 | 1.0000 | -      |
| Ihog   | 1.8e-06 | 0.0094 | 1.0000 | 1.0000 | 1.0000 |

P value adjustment method:holm

## STATISTICAL ANALYSIS OF HH RECRUITMENT

R version 3.5.2 (2018-12-20) -- "Eggshell Igloo"  
Copyright (C) 2018 The R Foundation for Statistical Computing  
Platform: i386-w64-mingw32/i386 (32-bit)

R is free software and comes with ABSOLUTELY NO WARRANTY.  
You are welcome to redistribute it under certain conditions.  
Type 'license()' or 'licence()' for distribution details.

R is a collaborative project with many contributors.  
Type 'contributors()' for more information and  
'citation()' on how to cite R or R packages in publications.

Type 'demo()' for some demos, 'help()' for on-line help, or  
'help.start()' for an HTML browser interface to help.  
Type 'q()' to quit R.

```
> library(readxl)
> HhR <- read_excel("C:/Users/USUARIO/Desktop/FOTOS NUEVAS/CUANTIFICAC
IÓN HH/HhR.xlsx")
> View(HhR)
> attach(HhR)
> Trat=split(HhR$Hh,HhR$Tratamiento,drop=FALSE)
> shapiro.test(Trat$Ihog)
```

Shapiro-wilk normality test

```
data:  Trat$Ihog
W = 0.91411, p-value = 0.464
```

```
> shapiro.test(Trat$DFN)
```

Shapiro-wilk normality test

```
data:  Trat$DFN
W = 0.94515, p-value = 0.6855
```

```
> shapiro.test(Trat$DFN1)
```

Shapiro-wilk normality test

```
data:  Trat$DFN1
W = 0.83649, p-value = 0.09214
```

```
> shapiro.test(Trat$DFN2)
```

Shapiro-wilk normality test

```
data:  Trat$DFN2
W = 0.94824, p-value = 0.726
```

```
> shapiro.test(Trat$`FN1 Cherry`)
```

Shapiro-wilk normality test

```
data:  Trat$`FN1 Cherry`
W = 0.87792, p-value = 0.2174
```

```
> shapiro.test(Trat$`FN1+++`)
```

Shapiro-wilk normality test

```
data:  Trat$`FN1+++`
W = 0.97907, p-value = 0.9549
```

```
> pairwise.t.test(Hh,Tratamiento)
```

Pairwise comparisons using t tests with pooled SD

data: Hh and Tratamiento

|            | DFN     | DFN1    | DFN2    | FN1 Cherry | FN1+++  |
|------------|---------|---------|---------|------------|---------|
| DFN1       | 1.000   | -       | -       | -          | -       |
| DFN2       | 3.3e-06 | 9.6e-06 | -       | -          | -       |
| FN1 Cherry | 0.012   | 0.027   | 0.027   | -          | -       |
| FN1+++     | 1.000   | 1.000   | 9.6e-06 | 0.027      | -       |
| Ihog       | < 2e-16 | < 2e-16 | < 2e-16 | < 2e-16    | < 2e-16 |

P value adjustment method: holm

```
> pairwise.t.test(Hh,Tratamiento, paired = FALSE)
```

Pairwise comparisons using t tests with pooled SD

data: Hh and Tratamiento

|            | DFN     | DFN1    | DFN2    | FN1 Cherry | FN1+++  |
|------------|---------|---------|---------|------------|---------|
| DFN1       | 1.000   | -       | -       | -          | -       |
| DFN2       | 3.3e-06 | 9.6e-06 | -       | -          | -       |
| FN1 Cherry | 0.012   | 0.027   | 0.027   | -          | -       |
| FN1+++     | 1.000   | 1.000   | 9.6e-06 | 0.027      | -       |
| Ihog       | < 2e-16 | < 2e-16 | < 2e-16 | < 2e-16    | < 2e-16 |

P value adjustment method:holm
